# Supplementary material for: Accurate sequencing of DNA motifs able to form alternative (non-B) structures
Source: HighWire-hosted journal article supplement (doi:10.1101/gr.277490.122), 2023-06-01
Supplement: Supplemental_Tables.xlsx [file Supplemental_Tables.xlsx]

## Sheet: Table S1
Table S1. Non-B motifs utilized in the study. Shown are total motif set length, mean and median individual motif length, and number (n) of motifs for each non-B DNA type analyzed. Annotations are for the human reference genome hg19.
Moderately filtered data set
Type	Total length (Mb)	Mean length (bp)	Median length (bp)	n
APhasedRepeats	6.8	26.0021	25	261798
DirectRepeats	10.19	28.2875	26	360335
G4Motifs	8.59	35.3654	33	243017
InvertedRepeats	79.67	21.1088	15	3774639
MirrorRepeats	29	58.2493	51	498033
ZDNAMotifs	2.76	12.4428	11	222534
Total	137.01			5360356
Stringently filtered data set: Illumina
Type	Total length (Mb)	Mean length (bp)	Median length (bp)	n
APhasedRepeats	1.00064	25.7558	25	38851
DirectRepeats	0.766689	28.2984	27	27093
G4Motifs	0.893571	32.8591	31	27194
InvertedRepeats	9.83866	16.5948	15	592876
MirrorRepeats	0.901834	46.9021	40	19228
ZDNAMotifs	0.05636	10.6119	10	5311
Total	13.4578			710553
Stringently filtered data set: HiFi
Type	Total length (Mb)	Mean length (bp)	Median length (bp)	n
APhasedRepeats	0.973618	25.7557	25	37802
DirectRepeats	0.597775	28.3265	27	21103
G4Motifs	0.897271	32.843	31	27320
InvertedRepeats	7.72735	16.5902	15	465777
MirrorRepeats	0.71936	47.0354	40	15294
ZDNAMotifs	0.030989	10.609	10	2921
Total	10.9464			570217
Stringently filtered data set: ONT
Type	Total length (Mb)	Mean length (bp)	Median length (bp)	n
APhasedRepeats	1.01142	25.7628	25	39259
DirectRepeats	0.798711	28.299	27	28224
G4Motifs	0.92181	32.8537	31	28058
InvertedRepeats	9.9659	16.5937	15	600584
MirrorRepeats	0.927623	46.9018	40	19778
ZDNAMotifs	0.059158	10.6094	10	5576
Total	13.6846			721479

## Sheet: Table S2
Table S2A. Sequencing success measures in non-B motifs and controls. In each row, aggregate (total number of errors divided by total number of nucleotides) and per-motif (or per-control) means of SNM rates, insertion rates, deletion rates, sequencing depth, and sequencing quality are shown for each non-B type, motifs and controls, technology, and filtering level.
Non-B type	Source	Measure of sequencing success	Technology	Filter level	Aggregate mean	Per-motif (or per-control) mean
APhasedRepeats	motif	Single-nucleotide mismatches	Illumina	moderate	0.0019948	0.00204108
APhasedRepeats	control	Single-nucleotide mismatches	Illumina	moderate	0.00218809	0.00227658
DirectRepeats	motif	Single-nucleotide mismatches	Illumina	moderate	0.00256072	0.00308004
DirectRepeats	control	Single-nucleotide mismatches	Illumina	moderate	0.00216891	0.00227984
G4Motifs	motif	Single-nucleotide mismatches	Illumina	moderate	0.00534691	0.00567057
G4Motifs	control	Single-nucleotide mismatches	Illumina	moderate	0.00225342	0.00237678
InvertedRepeats	motif	Single-nucleotide mismatches	Illumina	moderate	0.00205273	0.00214335
InvertedRepeats	control	Single-nucleotide mismatches	Illumina	moderate	0.0021733	0.00231477
MirrorRepeats	motif	Single-nucleotide mismatches	Illumina	moderate	0.00225126	0.00268539
MirrorRepeats	control	Single-nucleotide mismatches	Illumina	moderate	0.00210298	0.0022289
ZDNAMotifs	motif	Single-nucleotide mismatches	Illumina	moderate	0.00363309	0.0039027
ZDNAMotifs	control	Single-nucleotide mismatches	Illumina	moderate	0.00225825	0.00238168
APhasedRepeats	motif	Insertion mismatches	Illumina	moderate	9.85e-06	1.02e-05
APhasedRepeats	control	Insertion mismatches	Illumina	moderate	6.42e-06	6.8e-06
DirectRepeats	motif	Insertion mismatches	Illumina	moderate	0.00014784	0.00019035
DirectRepeats	control	Insertion mismatches	Illumina	moderate	5.65e-06	6.52e-06
G4Motifs	motif	Insertion mismatches	Illumina	moderate	3.71e-05	4.75e-05
G4Motifs	control	Insertion mismatches	Illumina	moderate	5.06e-06	5.38e-06
InvertedRepeats	motif	Insertion mismatches	Illumina	moderate	2.04e-05	2.16e-05
InvertedRepeats	control	Insertion mismatches	Illumina	moderate	6.45e-06	7.43e-06
MirrorRepeats	motif	Insertion mismatches	Illumina	moderate	4.36e-05	0.00010118
MirrorRepeats	control	Insertion mismatches	Illumina	moderate	4.8e-06	5.33e-06
ZDNAMotifs	motif	Insertion mismatches	Illumina	moderate	0.00037004	0.00030166
ZDNAMotifs	control	Insertion mismatches	Illumina	moderate	8.62e-06	1.03e-05
APhasedRepeats	motif	Deletion mismatches	Illumina	moderate	2.2e-05	2.2e-05
APhasedRepeats	control	Deletion mismatches	Illumina	moderate	1.81e-05	1.83e-05
DirectRepeats	motif	Deletion mismatches	Illumina	moderate	0.00013949	0.00016866
DirectRepeats	control	Deletion mismatches	Illumina	moderate	1.9e-05	2.05e-05
G4Motifs	motif	Deletion mismatches	Illumina	moderate	5.48e-05	6.08e-05
G4Motifs	control	Deletion mismatches	Illumina	moderate	1.97e-05	2.02e-05
InvertedRepeats	motif	Deletion mismatches	Illumina	moderate	3.26e-05	3.52e-05
InvertedRepeats	control	Deletion mismatches	Illumina	moderate	2e-05	2.2e-05
MirrorRepeats	motif	Deletion mismatches	Illumina	moderate	4.92e-05	9.13e-05
MirrorRepeats	control	Deletion mismatches	Illumina	moderate	1.75e-05	1.89e-05
ZDNAMotifs	motif	Deletion mismatches	Illumina	moderate	0.00031087	0.00027381
ZDNAMotifs	control	Deletion mismatches	Illumina	moderate	2.04e-05	2.16e-05
APhasedRepeats	motif	Average read depth per bp	Illumina	moderate	52.4303	52.3577
APhasedRepeats	control	Average read depth per bp	Illumina	moderate	49.9001	49.9009
DirectRepeats	motif	Average read depth per bp	Illumina	moderate	49.929	49.9425
DirectRepeats	control	Average read depth per bp	Illumina	moderate	49.4741	49.5998
G4Motifs	motif	Average read depth per bp	Illumina	moderate	39.0905	39.5357
G4Motifs	control	Average read depth per bp	Illumina	moderate	48.9079	48.9742
InvertedRepeats	motif	Average read depth per bp	Illumina	moderate	51.8526	51.6373
InvertedRepeats	control	Average read depth per bp	Illumina	moderate	49.9323	49.9144
MirrorRepeats	motif	Average read depth per bp	Illumina	moderate	51.9483	51.5643
MirrorRepeats	control	Average read depth per bp	Illumina	moderate	49.599	49.665
ZDNAMotifs	motif	Average read depth per bp	Illumina	moderate	47.1158	47.1284
ZDNAMotifs	control	Average read depth per bp	Illumina	moderate	49.5978	49.5919
APhasedRepeats	motif	Mean basequality	Illumina	moderate	NA*	36.484
APhasedRepeats	control	Mean basequality	Illumina	moderate	NA	35.8127
DirectRepeats	motif	Mean basequality	Illumina	moderate	NA	35.5378
DirectRepeats	control	Mean basequality	Illumina	moderate	NA	35.7842
G4Motifs	motif	Mean basequality	Illumina	moderate	NA	34.4807
G4Motifs	control	Mean basequality	Illumina	moderate	NA	35.7102
InvertedRepeats	motif	Mean basequality	Illumina	moderate	NA	36.0567
InvertedRepeats	control	Mean basequality	Illumina	moderate	NA	35.8044
MirrorRepeats	motif	Mean basequality	Illumina	moderate	NA	35.7826
MirrorRepeats	control	Mean basequality	Illumina	moderate	NA	35.8119
ZDNAMotifs	motif	Mean basequality	Illumina	moderate	NA	34.4445
ZDNAMotifs	control	Mean basequality	Illumina	moderate	NA	35.7642
APhasedRepeats	motif	Single-nucleotide mismatches	HiFi	moderate	0.0026966	0.00134444
APhasedRepeats	control	Single-nucleotide mismatches	HiFi	moderate	0.00142405	0.00133656
DirectRepeats	motif	Single-nucleotide mismatches	HiFi	moderate	0.00292168	0.00173745
DirectRepeats	control	Single-nucleotide mismatches	HiFi	moderate	0.00247392	0.00134065
G4Motifs	motif	Single-nucleotide mismatches	HiFi	moderate	0.0021955	0.00178046
G4Motifs	control	Single-nucleotide mismatches	HiFi	moderate	0.00141058	0.00136197
InvertedRepeats	motif	Single-nucleotide mismatches	HiFi	moderate	0.00158775	0.00139466
InvertedRepeats	control	Single-nucleotide mismatches	HiFi	moderate	0.00193571	0.00136694
MirrorRepeats	motif	Single-nucleotide mismatches	HiFi	moderate	0.0014777	0.00150903
MirrorRepeats	control	Single-nucleotide mismatches	HiFi	moderate	0.0020614	0.00133407
ZDNAMotifs	motif	Single-nucleotide mismatches	HiFi	moderate	0.00410413	0.00198861
ZDNAMotifs	control	Single-nucleotide mismatches	HiFi	moderate	0.00157854	0.00139365
APhasedRepeats	motif	Insertion mismatches	HiFi	moderate	0.00122994	0.00121871
APhasedRepeats	control	Insertion mismatches	HiFi	moderate	0.00099073	0.00099026
DirectRepeats	motif	Insertion mismatches	HiFi	moderate	0.0013138	0.00136002
DirectRepeats	control	Insertion mismatches	HiFi	moderate	0.00098985	0.00099299
G4Motifs	motif	Insertion mismatches	HiFi	moderate	0.00137272	0.00138639
G4Motifs	control	Insertion mismatches	HiFi	moderate	0.00099309	0.00099364
InvertedRepeats	motif	Insertion mismatches	HiFi	moderate	0.00106249	0.00106386
InvertedRepeats	control	Insertion mismatches	HiFi	moderate	0.00099533	0.00099848
MirrorRepeats	motif	Insertion mismatches	HiFi	moderate	0.00116961	0.00130062
MirrorRepeats	control	Insertion mismatches	HiFi	moderate	0.00098481	0.00098768
ZDNAMotifs	motif	Insertion mismatches	HiFi	moderate	0.00230766	0.00172055
ZDNAMotifs	control	Insertion mismatches	HiFi	moderate	0.00100808	0.00101336
APhasedRepeats	motif	Deletion mismatches	HiFi	moderate	0.00139292	0.00138571
APhasedRepeats	control	Deletion mismatches	HiFi	moderate	0.00104347	0.0010464
DirectRepeats	motif	Deletion mismatches	HiFi	moderate	0.00165942	0.00163291
DirectRepeats	control	Deletion mismatches	HiFi	moderate	0.00103602	0.00104581
G4Motifs	motif	Deletion mismatches	HiFi	moderate	0.00217954	0.00225067
G4Motifs	control	Deletion mismatches	HiFi	moderate	0.0010581	0.0010623
InvertedRepeats	motif	Deletion mismatches	HiFi	moderate	0.00135314	0.00141814
InvertedRepeats	control	Deletion mismatches	HiFi	moderate	0.00106859	0.00107798
MirrorRepeats	motif	Deletion mismatches	HiFi	moderate	0.00146677	0.00173423
MirrorRepeats	control	Deletion mismatches	HiFi	moderate	0.00102994	0.00103853
ZDNAMotifs	motif	Deletion mismatches	HiFi	moderate	0.00071473	0.00066204
ZDNAMotifs	control	Deletion mismatches	HiFi	moderate	0.00105214	0.0010713
APhasedRepeats	motif	Average read depth per bp	HiFi	moderate	14.8966	14.9093
APhasedRepeats	control	Average read depth per bp	HiFi	moderate	14.9848	14.9846
DirectRepeats	motif	Average read depth per bp	HiFi	moderate	14.9016	14.9062
DirectRepeats	control	Average read depth per bp	HiFi	moderate	15.0554	15.0698
G4Motifs	motif	Average read depth per bp	HiFi	moderate	14.9823	15.0305
G4Motifs	control	Average read depth per bp	HiFi	moderate	15.0453	15.0396
InvertedRepeats	motif	Average read depth per bp	HiFi	moderate	14.8677	14.8891
InvertedRepeats	control	Average read depth per bp	HiFi	moderate	15.0182	15.017
MirrorRepeats	motif	Average read depth per bp	HiFi	moderate	14.7206	14.7315
MirrorRepeats	control	Average read depth per bp	HiFi	moderate	15.0404	15.0489
ZDNAMotifs	motif	Average read depth per bp	HiFi	moderate	15.0997	15.1181
ZDNAMotifs	control	Average read depth per bp	HiFi	moderate	14.9982	15.0006
APhasedRepeats	motif	Mean basequality	HiFi	moderate	NA	84.3855
APhasedRepeats	control	Mean basequality	HiFi	moderate	NA	78.0925
DirectRepeats	motif	Mean basequality	HiFi	moderate	NA	77.4939
DirectRepeats	control	Mean basequality	HiFi	moderate	NA	78.039
G4Motifs	motif	Mean basequality	HiFi	moderate	NA	84.3819
G4Motifs	control	Mean basequality	HiFi	moderate	NA	77.9663
InvertedRepeats	motif	Mean basequality	HiFi	moderate	NA	78.203
InvertedRepeats	control	Mean basequality	HiFi	moderate	NA	78.0497
MirrorRepeats	motif	Mean basequality	HiFi	moderate	NA	78.3298
MirrorRepeats	control	Mean basequality	HiFi	moderate	NA	78.0356
ZDNAMotifs	motif	Mean basequality	HiFi	moderate	NA	69.9911
ZDNAMotifs	control	Mean basequality	HiFi	moderate	NA	78.0181
APhasedRepeats	motif	Single-nucleotide mismatches	ONT	moderate	0.0183548	0.0151822
APhasedRepeats	control	Single-nucleotide mismatches	ONT	moderate	0.0170359	0.0165471
DirectRepeats	motif	Single-nucleotide mismatches	ONT	moderate	0.0256102	0.0147627
DirectRepeats	control	Single-nucleotide mismatches	ONT	moderate	0.0184969	0.0166607
G4Motifs	motif	Single-nucleotide mismatches	ONT	moderate	0.0219705	0.0212261
G4Motifs	control	Single-nucleotide mismatches	ONT	moderate	0.0172055	0.0169249
InvertedRepeats	motif	Single-nucleotide mismatches	ONT	moderate	0.0178815	0.015667
InvertedRepeats	control	Single-nucleotide mismatches	ONT	moderate	0.0177182	0.0166017
MirrorRepeats	motif	Single-nucleotide mismatches	ONT	moderate	0.0151698	0.0141708
MirrorRepeats	control	Single-nucleotide mismatches	ONT	moderate	0.0174346	0.0165678
ZDNAMotifs	motif	Single-nucleotide mismatches	ONT	moderate	0.0161703	0.0149989
ZDNAMotifs	control	Single-nucleotide mismatches	ONT	moderate	0.0170071	0.0167129
APhasedRepeats	motif	Insertion mismatches	ONT	moderate	0.00668237	0.00668425
APhasedRepeats	control	Insertion mismatches	ONT	moderate	0.00664043	0.00663636
DirectRepeats	motif	Insertion mismatches	ONT	moderate	0.00727569	0.00692937
DirectRepeats	control	Insertion mismatches	ONT	moderate	0.00666811	0.00665923
G4Motifs	motif	Insertion mismatches	ONT	moderate	0.0107519	0.0108527
G4Motifs	control	Insertion mismatches	ONT	moderate	0.00678592	0.00677108
InvertedRepeats	motif	Insertion mismatches	ONT	moderate	0.00659752	0.00651367
InvertedRepeats	control	Insertion mismatches	ONT	moderate	0.00664164	0.00662674
MirrorRepeats	motif	Insertion mismatches	ONT	moderate	0.00684805	0.00697746
MirrorRepeats	control	Insertion mismatches	ONT	moderate	0.0066745	0.00666825
ZDNAMotifs	motif	Insertion mismatches	ONT	moderate	0.00756911	0.00721581
ZDNAMotifs	control	Insertion mismatches	ONT	moderate	0.0066605	0.00665136
APhasedRepeats	motif	Deletion mismatches	ONT	moderate	0.0106239	0.010606
APhasedRepeats	control	Deletion mismatches	ONT	moderate	0.0103281	0.0103298
DirectRepeats	motif	Deletion mismatches	ONT	moderate	0.0101859	0.0100192
DirectRepeats	control	Deletion mismatches	ONT	moderate	0.0103242	0.0103554
G4Motifs	motif	Deletion mismatches	ONT	moderate	0.0170838	0.0173514
G4Motifs	control	Deletion mismatches	ONT	moderate	0.0105584	0.0105541
InvertedRepeats	motif	Deletion mismatches	ONT	moderate	0.010428	0.0104234
InvertedRepeats	control	Deletion mismatches	ONT	moderate	0.0104042	0.0104834
MirrorRepeats	motif	Deletion mismatches	ONT	moderate	0.0105093	0.0106028
MirrorRepeats	control	Deletion mismatches	ONT	moderate	0.01026	0.0102879
ZDNAMotifs	motif	Deletion mismatches	ONT	moderate	0.0113387	0.0117477
ZDNAMotifs	control	Deletion mismatches	ONT	moderate	0.0105283	0.0105995
APhasedRepeats	motif	Average read depth per bp	ONT	moderate	28.7155	28.7297
APhasedRepeats	control	Average read depth per bp	ONT	moderate	28.538	28.5375
DirectRepeats	motif	Average read depth per bp	ONT	moderate	29.0288	29.0684
DirectRepeats	control	Average read depth per bp	ONT	moderate	28.5649	28.6217
G4Motifs	motif	Average read depth per bp	ONT	moderate	28.4031	28.4068
G4Motifs	control	Average read depth per bp	ONT	moderate	28.4939	28.4923
InvertedRepeats	motif	Average read depth per bp	ONT	moderate	28.5565	28.5893
InvertedRepeats	control	Average read depth per bp	ONT	moderate	28.5468	28.5701
MirrorRepeats	motif	Average read depth per bp	ONT	moderate	28.4483	28.4756
MirrorRepeats	control	Average read depth per bp	ONT	moderate	28.5271	28.5558
ZDNAMotifs	motif	Average read depth per bp	ONT	moderate	28.4763	28.486
ZDNAMotifs	control	Average read depth per bp	ONT	moderate	28.5034	28.5123
APhasedRepeats	motif	Single-nucleotide mismatches	Illumina	stringent	0.00200124	0.00205405
APhasedRepeats	control	Single-nucleotide mismatches	Illumina	stringent	0.00221834	0.00228819
DirectRepeats	motif	Single-nucleotide mismatches	Illumina	stringent	0.0023663	0.00256251
DirectRepeats	control	Single-nucleotide mismatches	Illumina	stringent	0.00219341	0.00226383
G4Motifs	motif	Single-nucleotide mismatches	Illumina	stringent	0.00439962	0.00471671
G4Motifs	control	Single-nucleotide mismatches	Illumina	stringent	0.00225413	0.00236367
InvertedRepeats	motif	Single-nucleotide mismatches	Illumina	stringent	0.0020669	0.00215268
InvertedRepeats	control	Single-nucleotide mismatches	Illumina	stringent	0.00224218	0.00233666
MirrorRepeats	motif	Single-nucleotide mismatches	Illumina	stringent	0.00212896	0.0023326
MirrorRepeats	control	Single-nucleotide mismatches	Illumina	stringent	0.00216417	0.00226719
ZDNAMotifs	motif	Single-nucleotide mismatches	Illumina	stringent	0.00343408	0.00361338
ZDNAMotifs	control	Single-nucleotide mismatches	Illumina	stringent	0.00228839	0.0024187
APhasedRepeats	motif	Insertion mismatches	Illumina	stringent	1.52e-05	1.55e-05
APhasedRepeats	control	Insertion mismatches	Illumina	stringent	3.26e-06	3.24e-06
DirectRepeats	motif	Insertion mismatches	Illumina	stringent	2.45e-05	3.08e-05
DirectRepeats	control	Insertion mismatches	Illumina	stringent	7.54e-06	8.43e-06
G4Motifs	motif	Insertion mismatches	Illumina	stringent	2.12e-05	2.87e-05
G4Motifs	control	Insertion mismatches	Illumina	stringent	3.07e-06	4.01e-06
InvertedRepeats	motif	Insertion mismatches	Illumina	stringent	7.64e-06	7.42e-06
InvertedRepeats	control	Insertion mismatches	Illumina	stringent	5.35e-06	5.12e-06
MirrorRepeats	motif	Insertion mismatches	Illumina	stringent	5.98e-06	1.32e-05
MirrorRepeats	control	Insertion mismatches	Illumina	stringent	6.85e-06	9.1e-06
ZDNAMotifs	motif	Insertion mismatches	Illumina	stringent	8.05e-07	8.45e-07
ZDNAMotifs	control	Insertion mismatches	Illumina	stringent	4.51e-06	2.93e-06
APhasedRepeats	motif	Deletion mismatches	Illumina	stringent	1.88e-05	1.88e-05
APhasedRepeats	control	Deletion mismatches	Illumina	stringent	1.55e-05	1.55e-05
DirectRepeats	motif	Deletion mismatches	Illumina	stringent	6.88e-05	7.22e-05
DirectRepeats	control	Deletion mismatches	Illumina	stringent	1.6e-05	1.67e-05
G4Motifs	motif	Deletion mismatches	Illumina	stringent	5.01e-05	5.41e-05
G4Motifs	control	Deletion mismatches	Illumina	stringent	1.88e-05	1.79e-05
InvertedRepeats	motif	Deletion mismatches	Illumina	stringent	2.38e-05	2.43e-05
InvertedRepeats	control	Deletion mismatches	Illumina	stringent	1.88e-05	1.94e-05
MirrorRepeats	motif	Deletion mismatches	Illumina	stringent	2.02e-05	2.32e-05
MirrorRepeats	control	Deletion mismatches	Illumina	stringent	1.67e-05	1.81e-05
ZDNAMotifs	motif	Deletion mismatches	Illumina	stringent	9.25e-06	8.14e-06
ZDNAMotifs	control	Deletion mismatches	Illumina	stringent	1.85e-05	1.89e-05
APhasedRepeats	motif	Average read depth per bp	Illumina	stringent	51.6206	51.5628
APhasedRepeats	control	Average read depth per bp	Illumina	stringent	49.4661	49.4679
DirectRepeats	motif	Average read depth per bp	Illumina	stringent	49.3977	49.4572
DirectRepeats	control	Average read depth per bp	Illumina	stringent	49.1591	49.1689
G4Motifs	motif	Average read depth per bp	Illumina	stringent	40.0252	40.1698
G4Motifs	control	Average read depth per bp	Illumina	stringent	48.7037	48.6966
InvertedRepeats	motif	Average read depth per bp	Illumina	stringent	50.6593	50.5538
InvertedRepeats	control	Average read depth per bp	Illumina	stringent	49.255	49.2452
MirrorRepeats	motif	Average read depth per bp	Illumina	stringent	51.3212	51.2687
MirrorRepeats	control	Average read depth per bp	Illumina	stringent	49.2627	49.2311
ZDNAMotifs	motif	Average read depth per bp	Illumina	stringent	44.1035	44.1161
ZDNAMotifs	control	Average read depth per bp	Illumina	stringent	49.0488	49.0185
APhasedRepeats	motif	Mean basequality	Illumina	stringent	NA	36.4914
APhasedRepeats	control	Mean basequality	Illumina	stringent	NA	35.8806
DirectRepeats	motif	Mean basequality	Illumina	stringent	NA	35.7945
DirectRepeats	control	Mean basequality	Illumina	stringent	NA	35.8587
G4Motifs	motif	Mean basequality	Illumina	stringent	NA	34.609
G4Motifs	control	Mean basequality	Illumina	stringent	NA	35.7937
InvertedRepeats	motif	Mean basequality	Illumina	stringent	NA	36.1082
InvertedRepeats	control	Mean basequality	Illumina	stringent	NA	35.8834
MirrorRepeats	motif	Mean basequality	Illumina	stringent	NA	35.9646
MirrorRepeats	control	Mean basequality	Illumina	stringent	NA	35.8875
ZDNAMotifs	motif	Mean basequality	Illumina	stringent	NA	34.7407
ZDNAMotifs	control	Mean basequality	Illumina	stringent	NA	35.8465
APhasedRepeats	motif	Single-nucleotide mismatches	HiFi	stringent	0.00132623	0.00131651
APhasedRepeats	control	Single-nucleotide mismatches	HiFi	stringent	0.00143184	0.00126644
DirectRepeats	motif	Single-nucleotide mismatches	HiFi	stringent	0.00140417	0.00137558
DirectRepeats	control	Single-nucleotide mismatches	HiFi	stringent	0.00130355	0.00130152
G4Motifs	motif	Single-nucleotide mismatches	HiFi	stringent	0.00176358	0.00167682
G4Motifs	control	Single-nucleotide mismatches	HiFi	stringent	0.00133096	0.00138632
InvertedRepeats	motif	Single-nucleotide mismatches	HiFi	stringent	0.00141435	0.00135782
InvertedRepeats	control	Single-nucleotide mismatches	HiFi	stringent	0.00150222	0.00134183
MirrorRepeats	motif	Single-nucleotide mismatches	HiFi	stringent	0.00141745	0.00150379
MirrorRepeats	control	Single-nucleotide mismatches	HiFi	stringent	0.00132534	0.00136973
ZDNAMotifs	motif	Single-nucleotide mismatches	HiFi	stringent	0.0016874	0.00162926
ZDNAMotifs	control	Single-nucleotide mismatches	HiFi	stringent	0.00141344	0.00143702
APhasedRepeats	motif	Insertion mismatches	HiFi	stringent	0.00121902	0.00121457
APhasedRepeats	control	Insertion mismatches	HiFi	stringent	0.00099585	0.00100007
DirectRepeats	motif	Insertion mismatches	HiFi	stringent	0.0010488	0.00105842
DirectRepeats	control	Insertion mismatches	HiFi	stringent	0.00102216	0.00102471
G4Motifs	motif	Insertion mismatches	HiFi	stringent	0.00127445	0.00130312
G4Motifs	control	Insertion mismatches	HiFi	stringent	0.00100542	0.00100504
InvertedRepeats	motif	Insertion mismatches	HiFi	stringent	0.00108165	0.00108313
InvertedRepeats	control	Insertion mismatches	HiFi	stringent	0.00100282	0.00100356
MirrorRepeats	motif	Insertion mismatches	HiFi	stringent	0.00113424	0.0012054
MirrorRepeats	control	Insertion mismatches	HiFi	stringent	0.00101043	0.00100756
ZDNAMotifs	motif	Insertion mismatches	HiFi	stringent	0.00137262	0.00139399
ZDNAMotifs	control	Insertion mismatches	HiFi	stringent	0.00100887	0.00101125
APhasedRepeats	motif	Deletion mismatches	HiFi	stringent	0.00137887	0.00137129
APhasedRepeats	control	Deletion mismatches	HiFi	stringent	0.00109582	0.001102
DirectRepeats	motif	Deletion mismatches	HiFi	stringent	0.00130265	0.00130066
DirectRepeats	control	Deletion mismatches	HiFi	stringent	0.00110311	0.00110812
G4Motifs	motif	Deletion mismatches	HiFi	stringent	0.0023674	0.00243336
G4Motifs	control	Deletion mismatches	HiFi	stringent	0.00112413	0.0011249
InvertedRepeats	motif	Deletion mismatches	HiFi	stringent	0.0014942	0.00153096
InvertedRepeats	control	Deletion mismatches	HiFi	stringent	0.00110749	0.00111182
MirrorRepeats	motif	Deletion mismatches	HiFi	stringent	0.00156069	0.00175213
MirrorRepeats	control	Deletion mismatches	HiFi	stringent	0.00110099	0.0011061
ZDNAMotifs	motif	Deletion mismatches	HiFi	stringent	0.00026767	0.0002708
ZDNAMotifs	control	Deletion mismatches	HiFi	stringent	0.00111102	0.00112136
APhasedRepeats	motif	Average read depth per bp	HiFi	stringent	14.9453	14.9574
APhasedRepeats	control	Average read depth per bp	HiFi	stringent	15.0511	15.0521
DirectRepeats	motif	Average read depth per bp	HiFi	stringent	14.9789	14.9893
DirectRepeats	control	Average read depth per bp	HiFi	stringent	15.0607	15.0633
G4Motifs	motif	Average read depth per bp	HiFi	stringent	15.2274	15.2458
G4Motifs	control	Average read depth per bp	HiFi	stringent	15.1245	15.1146
InvertedRepeats	motif	Average read depth per bp	HiFi	stringent	15.0009	15.0071
InvertedRepeats	control	Average read depth per bp	HiFi	stringent	15.0731	15.0705
MirrorRepeats	motif	Average read depth per bp	HiFi	stringent	14.8873	14.8921
MirrorRepeats	control	Average read depth per bp	HiFi	stringent	15.0764	15.0828
ZDNAMotifs	motif	Average read depth per bp	HiFi	stringent	15.0695	15.0822
ZDNAMotifs	control	Average read depth per bp	HiFi	stringent	15.0654	15.0771
APhasedRepeats	motif	Mean basequality	HiFi	stringent	NA	84.8275
APhasedRepeats	control	Mean basequality	HiFi	stringent	NA	82.7397
DirectRepeats	motif	Mean basequality	HiFi	stringent	NA	82.7326
DirectRepeats	control	Mean basequality	HiFi	stringent	NA	82.7383
G4Motifs	motif	Mean basequality	HiFi	stringent	NA	84.7176
G4Motifs	control	Mean basequality	HiFi	stringent	NA	82.6063
InvertedRepeats	motif	Mean basequality	HiFi	stringent	NA	82.9674
InvertedRepeats	control	Mean basequality	HiFi	stringent	NA	82.7137
MirrorRepeats	motif	Mean basequality	HiFi	stringent	NA	83.1645
MirrorRepeats	control	Mean basequality	HiFi	stringent	NA	82.7006
ZDNAMotifs	motif	Mean basequality	HiFi	stringent	NA	79.2437
ZDNAMotifs	control	Mean basequality	HiFi	stringent	NA	82.6552
APhasedRepeats	motif	Single-nucleotide mismatches	ONT	stringent	0.0154153	0.0153268
APhasedRepeats	control	Single-nucleotide mismatches	ONT	stringent	0.0171471	0.017018
DirectRepeats	motif	Single-nucleotide mismatches	ONT	stringent	0.0167062	0.0164128
DirectRepeats	control	Single-nucleotide mismatches	ONT	stringent	0.0172827	0.0171239
G4Motifs	motif	Single-nucleotide mismatches	ONT	stringent	0.0224773	0.0221147
G4Motifs	control	Single-nucleotide mismatches	ONT	stringent	0.017464	0.0173838
InvertedRepeats	motif	Single-nucleotide mismatches	ONT	stringent	0.0166335	0.0163231
InvertedRepeats	control	Single-nucleotide mismatches	ONT	stringent	0.0173444	0.0171219
MirrorRepeats	motif	Single-nucleotide mismatches	ONT	stringent	0.0160168	0.0155708
MirrorRepeats	control	Single-nucleotide mismatches	ONT	stringent	0.0175636	0.0171692
ZDNAMotifs	motif	Single-nucleotide mismatches	ONT	stringent	0.0201468	0.0199205
ZDNAMotifs	control	Single-nucleotide mismatches	ONT	stringent	0.0173779	0.0172825
APhasedRepeats	motif	Insertion mismatches	ONT	stringent	0.00672793	0.00672153
APhasedRepeats	control	Insertion mismatches	ONT	stringent	0.00681914	0.00681641
DirectRepeats	motif	Insertion mismatches	ONT	stringent	0.00673143	0.006755
DirectRepeats	control	Insertion mismatches	ONT	stringent	0.00683092	0.00683192
G4Motifs	motif	Insertion mismatches	ONT	stringent	0.0103502	0.0104749
G4Motifs	control	Insertion mismatches	ONT	stringent	0.00690414	0.0068947
InvertedRepeats	motif	Insertion mismatches	ONT	stringent	0.00686924	0.00686036
InvertedRepeats	control	Insertion mismatches	ONT	stringent	0.00680624	0.00680677
MirrorRepeats	motif	Insertion mismatches	ONT	stringent	0.0069277	0.00703032
MirrorRepeats	control	Insertion mismatches	ONT	stringent	0.00681973	0.00682601
ZDNAMotifs	motif	Insertion mismatches	ONT	stringent	0.00667717	0.0066873
ZDNAMotifs	control	Insertion mismatches	ONT	stringent	0.00682168	0.00683978
APhasedRepeats	motif	Deletion mismatches	ONT	stringent	0.0107426	0.0107081
APhasedRepeats	control	Deletion mismatches	ONT	stringent	0.0106209	0.0106224
DirectRepeats	motif	Deletion mismatches	ONT	stringent	0.0106328	0.0106363
DirectRepeats	control	Deletion mismatches	ONT	stringent	0.0106316	0.0106675
G4Motifs	motif	Deletion mismatches	ONT	stringent	0.0161549	0.0164052
G4Motifs	control	Deletion mismatches	ONT	stringent	0.0107276	0.0107272
InvertedRepeats	motif	Deletion mismatches	ONT	stringent	0.0112965	0.0112882
InvertedRepeats	control	Deletion mismatches	ONT	stringent	0.0107547	0.0107928
MirrorRepeats	motif	Deletion mismatches	ONT	stringent	0.0112857	0.0116817
MirrorRepeats	control	Deletion mismatches	ONT	stringent	0.0105455	0.0105767
ZDNAMotifs	motif	Deletion mismatches	ONT	stringent	0.0128169	0.0128681
ZDNAMotifs	control	Deletion mismatches	ONT	stringent	0.0107818	0.0108588
APhasedRepeats	motif	Average read depth per bp	ONT	stringent	28.5041	28.509
APhasedRepeats	control	Average read depth per bp	ONT	stringent	28.4516	28.449
DirectRepeats	motif	Average read depth per bp	ONT	stringent	28.5133	28.5112
DirectRepeats	control	Average read depth per bp	ONT	stringent	28.5754	28.5777
G4Motifs	motif	Average read depth per bp	ONT	stringent	28.4104	28.4182
G4Motifs	control	Average read depth per bp	ONT	stringent	28.4885	28.4929
InvertedRepeats	motif	Average read depth per bp	ONT	stringent	28.514	28.5192
InvertedRepeats	control	Average read depth per bp	ONT	stringent	28.5239	28.5169
MirrorRepeats	motif	Average read depth per bp	ONT	stringent	28.4887	28.4886
MirrorRepeats	control	Average read depth per bp	ONT	stringent	28.5601	28.5532
ZDNAMotifs	motif	Average read depth per bp	ONT	stringent	28.4324	28.4264
ZDNAMotifs	control	Average read depth per bp	ONT	stringent	28.5181	28.5053
Overall	Overall	Deletion mismatches	HiFi	moderate	0.00124	0.00127
Overall	Overall	Insertion mismatches	HiFi	moderate	0.00107	0.00108
Overall	Overall	Single-nucleotide mismatches	HiFi	moderate	0.00188	0.00141
Overall	Overall	Deletion mismatches	Illumina	moderate	3e-05	4e-05
Overall	Overall	Insertion mismatches	Illumina	moderate	2e-05	3e-05
Overall	Overall	Single-nucleotide mismatches	Illumina	moderate	0.00224	0.0024
Overall	Overall	Deletion mismatches	ONT	moderate	0.01062	0.01062
Overall	Overall	Insertion mismatches	ONT	moderate	0.00682	0.00673
Overall	Overall	Single-nucleotide mismatches	ONT	moderate	0.01789	0.01614
Overall	Overall	Deletion mismatches	HiFi	stringent	0.00133	0.00133
Overall	Overall	Insertion mismatches	HiFi	stringent	0.00106	0.00105
Overall	Overall	Single-nucleotide mismatches	HiFi	stringent	0.00145	0.00136
Overall	Overall	Deletion mismatches	Illumina	stringent	2e-05	2e-05
Overall	Overall	Insertion mismatches	Illumina	stringent	1e-05	1e-05
Overall	Overall	Single-nucleotide mismatches	Illumina	stringent	0.00222	0.00231
Overall	Overall	Deletion mismatches	ONT	stringent	0.01112	0.0111
Overall	Overall	Insertion mismatches	ONT	stringent	0.00695	0.0069
Overall	Overall	Single-nucleotide mismatches	ONT	stringent	0.01714	0.01683
NA* - not applicable or not available
Table S2B. Overall mismatch error rates. Shown are mismatch (single-nucleotide, insertion, and deletion) error rates across all motifs and controls of the moderately filtered set.
Technology	Single-nucleotide	Insertion	Deletion
Illumina	0.002241	2.4e-05	3.4e-05
HiFi	0.001881	0.001072	0.001242
ONT	0.01789	0.006818	0.010617

## Sheet: Table S3
Table S3. Regions with at least one mismatch error. In each row, aggregate (total number of errors divided by total number of nucleotides) means of SNM rates, insertion rates and deletion rates in motifs and controls that exhibit at least one mismatch error ('non-zero') are shown together with the number and proportion of such non-zero regions for each non-B type and technology.
	Aggregate error rate for non-zero regions		Number non-zero regions		Percent non-zero regions
Non-B motif type	Motif	Control	Motif	Control	Motif	Control	Error type	Technology
APhasedRepeats	0.00102815	0.00099752	5211	4441	1.99047	1.69635	Deletion	Illumina
DirectRepeats	0.0034564	0.00040662	14384	8975	3.99184	2.49074	Deletion	Illumina
G4Motifs	0.00142148	0.00064969	8289	5773	3.41087	2.37555	Deletion	Illumina
InvertedRepeats	0.00101445	0.00065296	64408	55115	1.70634	1.46014	Deletion	Illumina
MirrorRepeats	0.0007305	0.00029084	28064	18718	5.63497	3.75839	Deletion	Illumina
ZDNAMotifs	0.00462194	0.00130515	10843	2446	4.87251	1.09916	Deletion	Illumina
APhasedRepeats	0.00455104	0.0043376	532	376	0.20321	0.143622	Insertion mismatches	Illumina
DirectRepeats	0.00822128	0.00160981	7601	673	2.10943	0.186771	Insertion mismatches	Illumina
G4Motifs	0.00382688	0.00249961	2306	426	0.948905	0.175296	Insertion mismatches	Illumina
InvertedRepeats	0.00428228	0.00270626	11146	4710	0.295287	0.12478	Insertion mismatches	Illumina
MirrorRepeats	0.0037161	0.00120826	8022	1331	1.61074	0.267251	Insertion mismatches	Illumina
ZDNAMotifs	0.0119728	0.00673072	5023	226	2.25718	0.101558	Insertion mismatches	Illumina
APhasedRepeats	0.00255966	0.002794	199904	200971	76.3581	76.7657	Single-nucleotide mismatches	Illumina
DirectRepeats	0.00323131	0.00249819	276297	292262	76.6778	81.1084	Single-nucleotide mismatches	Illumina
G4Motifs	0.00581982	0.00262893	218989	200018	90.1126	82.3062	Single-nucleotide mismatches	Illumina
InvertedRepeats	0.00275241	0.00284993	2428418	2483868	64.3351	65.8041	Single-nucleotide mismatches	Illumina
MirrorRepeats	0.00241578	0.00225623	435014	435610	87.3464	87.4661	Single-nucleotide mismatches	Illumina
ZDNAMotifs	0.00549552	0.00328813	140884	135383	63.309	60.837	Single-nucleotide mismatches	Illumina
APhasedRepeats	0.00351019	0.00334737	96487	76147	36.8555	29.0862	Deletion	HiFi
DirectRepeats	0.00445195	0.00212082	123846	129785	34.3697	36.0179	Deletion	HiFi
G4Motifs	0.00332679	0.00245302	146673	89832	60.355	36.9653	Deletion	HiFi
InvertedRepeats	0.00351879	0.00284305	965207	867941	25.5708	22.994	Deletion	HiFi
MirrorRepeats	0.00223212	0.00167041	281011	236482	56.4242	47.4832	Deletion	HiFi
ZDNAMotifs	0.00856454	0.00410122	14740	42318	6.62371	19.0164	Deletion	HiFi
APhasedRepeats	0.00332568	0.00309705	89585	77684	34.2191	29.6733	Insertion mismatches	HiFi
DirectRepeats	0.00352165	0.00199774	121292	132376	33.6609	36.7369	Insertion mismatches	HiFi
G4Motifs	0.00270011	0.0022777	109864	90656	45.2084	37.3044	Insertion mismatches	HiFi
InvertedRepeats	0.00287992	0.00262027	889330	881745	23.5607	23.3597	Insertion mismatches	HiFi
MirrorRepeats	0.0018633	0.00159142	259692	238171	52.1435	47.8223	Insertion mismatches	HiFi
ZDNAMotifs	0.00888487	0.00375187	48828	44146	21.9418	19.8379	Insertion mismatches	HiFi
APhasedRepeats	0.0510723	0.0302104	11659	11229	4.45343	4.28918	Single-nucleotide mismatches	HiFi
DirectRepeats	0.0358512	0.0265724	25590	19645	7.10172	5.45187	Single-nucleotide mismatches	HiFi
G4Motifs	0.0199555	0.0210372	23143	13095	9.5232	5.38851	Single-nucleotide mismatches	HiFi
InvertedRepeats	0.0239544	0.0293248	158356	145206	4.19526	3.84688	Single-nucleotide mismatches	HiFi
MirrorRepeats	0.0121953	0.0184083	51546	36990	10.3499	7.42722	Single-nucleotide mismatches	HiFi
ZDNAMotifs	0.0846348	0.0372906	8336	7415	3.74594	3.33208	Single-nucleotide mismatches	HiFi
APhasedRepeats	0.0107949	0.010516	256706	256145	98.055	97.8407	Deletion	ONT
DirectRepeats	0.0105873	0.010413	342762	354699	95.1231	98.4359	Deletion	ONT
G4Motifs	0.0171296	0.0106364	241497	240019	99.3745	98.7663	Deletion	ONT
InvertedRepeats	0.0110432	0.0109228	3442786	3482387	91.2084	92.2575	Deletion	ONT
MirrorRepeats	0.0106017	0.010293	486590	493470	97.7024	99.0838	Deletion	ONT
ZDNAMotifs	0.0122858	0.011362	203973	198196	91.6593	89.0632	Deletion	ONT
APhasedRepeats	0.00683494	0.00681837	254721	253591	97.2968	96.8651	Insertion mismatches	ONT
DirectRepeats	0.00753981	0.00675495	344214	352041	95.5261	97.6983	Insertion mismatches	ONT
G4Motifs	0.0107721	0.00686188	241749	238606	99.4782	98.1849	Insertion mismatches	ONT
InvertedRepeats	0.00709818	0.00710309	3355816	3376625	88.9043	89.4556	Insertion mismatches	ONT
MirrorRepeats	0.00689952	0.00670654	488122	491418	98.01	98.6718	Insertion mismatches	ONT
ZDNAMotifs	0.00873145	0.00739526	187175	189875	84.1107	85.324	Insertion mismatches	ONT
APhasedRepeats	0.0186899	0.0172655	256007	257378	97.788	98.3117	Single-nucleotide mismatches	ONT
DirectRepeats	0.0269757	0.0186215	336480	355728	93.3798	98.7215	Single-nucleotide mismatches	ONT
G4Motifs	0.0220251	0.0173003	241479	240658	99.3671	99.0293	Single-nucleotide mismatches	ONT
InvertedRepeats	0.0187571	0.0184032	3492407	3539682	92.5229	93.7754	Single-nucleotide mismatches	ONT
MirrorRepeats	0.0154134	0.0174804	477370	494169	95.8511	99.2241	Single-nucleotide mismatches	ONT
ZDNAMotifs	0.0208188	0.0180737	170838	202583	76.7694	91.0346	Single-nucleotide mismatches	ONT

## Sheet: Table S4
Table S4. Adjusted p-values calculated for t-test comparing error rates between motifs and controls and adjusted for multiple testing with the Benjamini-Hochberg correction. P-values below 0.05 are shown in bold.
Type	Tech	Filter level	adjusted P-value SNM	adjusted P-value Insertion	adjusted P-value Deletion
APhasedRepeats	Illumina	moderate	4.75e-94	0.0561721	0.00632872
DirectRepeats	Illumina	moderate	0	0	0
G4Motifs	Illumina	moderate	0	7.21e-92	1.24e-82
InvertedRepeats	Illumina	moderate	0	2.47e-163	4e-117
MirrorRepeats	Illumina	moderate	0	0	0
ZDNAMotifs	Illumina	moderate	0	0	1.01e-293
APhasedRepeats	HiFi	moderate	0.820273	0	0
DirectRepeats	HiFi	moderate	4.35e-34	0	0
G4Motifs	HiFi	moderate	2.56e-25	0	0
InvertedRepeats	HiFi	moderate	0.023743	1.77e-293	0
MirrorRepeats	HiFi	moderate	2.07e-11	0	0
ZDNAMotifs	HiFi	moderate	5.39e-38	0	1.65e-282
APhasedRepeats	ONT	moderate	9.54e-124	0.00011708	1.19e-43
DirectRepeats	ONT	moderate	6.91e-270	7.59e-133	5.13e-73
G4Motifs	ONT	moderate	0	0	0
InvertedRepeats	ONT	moderate	0	9.61e-216	1.34e-18
MirrorRepeats	ONT	moderate	0	0	5.01e-122
ZDNAMotifs	ONT	moderate	6.74e-100	1.04e-209	0
APhasedRepeats	Illumina	stringent	1.73e-14	0.00811513	0.240874
DirectRepeats	Illumina	stringent	3.55e-11	0.00045859	2.3e-12
G4Motifs	Illumina	stringent	2.41e-289	1.78e-05	1.36e-08
InvertedRepeats	Illumina	stringent	2.42e-93	0.0675123	9.35e-05
MirrorRepeats	Illumina	stringent	0.820273	0.39101	0.240874
ZDNAMotifs	Illumina	stringent	6.84e-21	0.182464	0.0604115
APhasedRepeats	HiFi	stringent	0.820273	2.82e-43	1e-55
DirectRepeats	HiFi	stringent	0.820273	0.182464	1.91e-16
G4Motifs	HiFi	stringent	0.359651	1.1e-49	0
InvertedRepeats	HiFi	stringent	0.820273	5.31e-54	0
MirrorRepeats	HiFi	stringent	0.820273	4.25e-26	1.46e-150
ZDNAMotifs	HiFi	stringent	0.820273	9.73e-09	2.57e-57
APhasedRepeats	ONT	stringent	1.04e-31	0.0063392	0.240874
DirectRepeats	ONT	stringent	0.00027846	0.102689	0.619297
G4Motifs	ONT	stringent	2.38e-101	0	0
InvertedRepeats	ONT	stringent	1.73e-93	5.59e-08	2.36e-179
MirrorRepeats	ONT	stringent	4.26e-16	4.27e-09	1.61e-63
ZDNAMotifs	ONT	stringent	6.57e-12	0.182464	2.19e-47

## Sheet: Table S5
Table S5. Poisson regressions for different reduced models. Shown are % deviance explained for the full model, and the % reduction in deviance explained when individual predictors are removed for different non-B motif types, error types, technologies, and filtering schemes.
Non-B type	Error type	Technology	Filtering level	Deviance explained (full model)		Reduction in deviance explained when removing the following predictors
					log P-value goodness-of-fit chi-square test	Motif vs. control	Nucleotide composition	Motif length	Presence of homopolymers
APhasedRepeats	SNM	Illumina	moderate	0.017	-17831.7	0	0.8937	0.0006	0.0001
DirectRepeats	SNM	Illumina	moderate	0.0532	-114650	0.119	0.9081	0.0309	0.0175
G4Motifs	SNM	Illumina	moderate	0.1669	-372075	0.0529	0.2777	0.0899	0.0026
InvertedRepeats	SNM	Illumina	moderate	0.0245	-328117	0.0184	0.9215	0.0186	0.003
MirrorRepeats	SNM	Illumina	moderate	0.087	-332839	0.0584	0.978	0.0115	0.0087
ZDNAMotifs	SNM	Illumina	moderate	0.0461	-39080.5	0.3152	0.3756	0.0019	0.0059
APhasedRepeats	Insertion	Illumina	moderate	0.0101	-402.131	0.2164	0.2588	0.0638	0.2889
DirectRepeats	Insertion	Illumina	moderate	0.1696	-73802.3	0.4771	0.0983	0.1325	0.0295
G4Motifs	Insertion	Illumina	moderate	0.0903	-8097.49	0.0151	0.3238	0.0248	0.0108
InvertedRepeats	Insertion	Illumina	moderate	0.0239	-18698	0.8523	0.0268	0.0201	0.0464
MirrorRepeats	Insertion	Illumina	moderate	0.2046	-90440.6	0.3948	0.066	0.3815	0.053
ZDNAMotifs	Insertion	Illumina	moderate	0.2154	-54332.4	0.8383	0.0423	0.3107	0
APhasedRepeats	Deletion	Illumina	moderate	0.0035	-212.405	0.281	0.1553	0.1125	0.391
DirectRepeats	Deletion	Illumina	moderate	0.0938	-37338.8	0.6453	0.1111	0.015	0.0095
G4Motifs	Deletion	Illumina	moderate	0.031	-3606.7	0.0198	0.1163	0.029	0.0168
InvertedRepeats	Deletion	Illumina	moderate	0.0075	-7874.66	0.7525	0.0309	0.2093	0.026
MirrorRepeats	Deletion	Illumina	moderate	0.0971	-41479.5	0.4726	0.0461	0.4944	0.0271
ZDNAMotifs	Deletion	Illumina	moderate	0.1634	-32898	0.832	0.0396	0.2372	0.0008
APhasedRepeats	SNM	HiFi	moderate	0.0008	-870.534	0.3794	0.6603	0.1356	0.0109
DirectRepeats	SNM	HiFi	moderate	0.0069	-13955	0.3324	0.233	0.2234	0.0348
G4Motifs	SNM	HiFi	moderate	0.0032	-4689.57	0.056	0.222	0.1241	0.0281
InvertedRepeats	SNM	HiFi	moderate	0.0006	-8462.14	0.1333	0.4778	0.4996	0.141
MirrorRepeats	SNM	HiFi	moderate	0.0018	-7905.51	0.1328	0.1975	0.6425	0.0015
ZDNAMotifs	SNM	HiFi	moderate	0.0066	-4226.77	0.5326	0.0437	0.0355	0.0028
APhasedRepeats	Insertion	HiFi	moderate	0.0187	-4998.89	0.1159	0.0144	0.0032	0.7345
DirectRepeats	Insertion	HiFi	moderate	0.0232	-10712.1	0.426	0.1495	0.1577	0.3921
G4Motifs	Insertion	HiFi	moderate	0.0236	-6801.45	0.0142	0.2245	0.014	0.1971
InvertedRepeats	Insertion	HiFi	moderate	0.0121	-38615.7	0.0312	0.0075	0.2259	0.9593
MirrorRepeats	Insertion	HiFi	moderate	0.0207	-14125.9	0.4492	0.1564	0.5095	0.2684
ZDNAMotifs	Insertion	HiFi	moderate	0.0461	-10271.6	0.9349	0.0055	0.3389	0.06
APhasedRepeats	Deletion	HiFi	moderate	0.0766	-22466.9	0.0289	0.0046	0.0045	0.8724
DirectRepeats	Deletion	HiFi	moderate	0.1195	-63939.5	0.1747	0.0051	0.0913	0.7936
G4Motifs	Deletion	HiFi	moderate	0.1186	-40946.4	0.0511	0.0231	0.0488	0.3093
InvertedRepeats	Deletion	HiFi	moderate	0.1119	-435199	0.0429	0.0001	0.2498	0.9171
MirrorRepeats	Deletion	HiFi	moderate	0.1167	-94255.7	0.1991	0.0086	0.3906	0.5785
ZDNAMotifs	Deletion	HiFi	moderate	0.0478	-8914.1	0.1857	0.0094	0.2004	0.6609
APhasedRepeats	SNM	ONT	moderate	0.0122	-33839.3	0.0211	0.6912	0.0066	0.077
DirectRepeats	SNM	ONT	moderate	0.0154	-84234.5	0.1238	0.7679	0.1065	0.0497
G4Motifs	SNM	ONT	moderate	0.0294	-101346	0.0106	0.3933	0.0014	0.0007
InvertedRepeats	SNM	ONT	moderate	0.0147	-503813	0.013	0.8484	0.0218	0.0317
MirrorRepeats	SNM	ONT	moderate	0.023	-225313	0.1583	0.681	0.1418	0.0029
ZDNAMotifs	SNM	ONT	moderate	0.0154	-32004.1	0.7059	0.3791	0.5507	0.0035
APhasedRepeats	Insertion	ONT	moderate	0.0277014	-12162.4	0.0721002	0.882697	0.000106858	0.219393
DirectRepeats	Insertion	ONT	moderate	0.0500477	-41068.2	0.0353497	0.870892	0.0168718	0.167017
G4Motifs	Insertion	ONT	moderate	0.224973	-131103	0.0245829	0.143355	0.00179857	0.0018972
InvertedRepeats	Insertion	ONT	moderate	0.0264847	-173246	0.00366063	0.880278	0.0133622	0.208805
MirrorRepeats	Insertion	ONT	moderate	0.0900141	-101189	0.0541052	0.95054	0.0331653	0.0622757
ZDNAMotifs	Insertion	ONT	moderate	0.0235707	-9435.03	0.639234	0.21217	0.514407	0.0412684
APhasedRepeats	Deletion	ONT	moderate	0.086	-75007.8	0.0445	0.4627	0.0015	0.6856
DirectRepeats	Deletion	ONT	moderate	0.1099	-173716	0.0112	0.5736	0.0507	0.538
G4Motifs	Deletion	ONT	moderate	0.2372	-297358	0.0067	0.2264	0.0191	0.1209
InvertedRepeats	Deletion	ONT	moderate	0.0916	-1.15398e+06	0.0082	0.5186	0.1239	0.6175
MirrorRepeats	Deletion	ONT	moderate	0.125	-286550	0.0225	0.7526	0.0563	0.3481
ZDNAMotifs	Deletion	ONT	moderate	0.084	-52356.4	0.1893	0.5043	0.3013	0.2494
APhasedRepeats	SNM	Illumina	stringent	0.0165	-2503.9	0.0024	0.8771	0.0036	0.0039
DirectRepeats	SNM	Illumina	stringent	0.0248	-3402.92	0.091	0.9494	0.0097	0.0464
G4Motifs	SNM	Illumina	stringent	0.0956	-15623.9	0.0272	0.3266	0.0311	0.0024
InvertedRepeats	SNM	Illumina	stringent	0.0137	-25352.6	0.0196	0.8589	0.0033	0.0102
MirrorRepeats	SNM	Illumina	stringent	0.0303	-4552.6	0.0273	0.9733	0.0322	0.0111
ZDNAMotifs	SNM	Illumina	stringent	0.0253	-1550.93	0.0828	0.6101	0.0027	0.0098
APhasedRepeats	Insertion	Illumina	stringent	0.0554	-162.707	0.2276	0.3904	0.0138	0.008
DirectRepeats	Insertion	Illumina	stringent	0.0682	-438.128	0.8213	0.1652	0.088	0.0337
G4Motifs	Insertion	Illumina	stringent	0.1087	-480.606	0.0163	0.3428	0.0481	0.0842
InvertedRepeats	Insertion	Illumina	stringent	0.0076	-375.979	0.2091	0.0431	0.1123	0.3439
MirrorRepeats	Insertion	Illumina	stringent	0.0438	-83.939	0.0583	0.2931	0.2995	0.5384
ZDNAMotifs	Insertion	Illumina	stringent	0.0291	-3.46915	0.1395	0.0261	0.2954	0.6942
APhasedRepeats	Deletion	Illumina	stringent	0.0056	-35.2713	0.0717	0.3163	0.2329	0.2705
DirectRepeats	Deletion	Illumina	stringent	0.0614	-955.625	0.8787	0.1357	0.1751	0.0142
G4Motifs	Deletion	Illumina	stringent	0.0435	-316.212	0.0625	0.2545	0.0696	0.1158
InvertedRepeats	Deletion	Illumina	stringent	0.0045	-468.439	0.3186	0.0499	0.0566	0.6791
MirrorRepeats	Deletion	Illumina	stringent	0.0078	-52.4719	0.3267	0.328	0.342	0.3471
ZDNAMotifs	Deletion	Illumina	stringent	0.0072	-6.98857	0.3912	0.3973	0.2134	0.362
APhasedRepeats	SNM	HiFi	stringent	0.0039	-474.257	0.2474	0.445	0.4433	0.0583
DirectRepeats	SNM	HiFi	stringent	0.0015	-135.236	0.4492	0.2498	0.4335	0.0146
G4Motifs	SNM	HiFi	stringent	0.0067	-655.408	0.0226	0.3234	0.114	0.0415
InvertedRepeats	SNM	HiFi	stringent	0.0009	-1106.79	0.0507	0.7574	0.1941	0.2465
MirrorRepeats	SNM	HiFi	stringent	0.004	-475.019	0.1349	0.2895	0.6026	0.1497
ZDNAMotifs	SNM	HiFi	stringent	0.0024	-63.2471	0.0103	0.7078	0.2155	0.0176
APhasedRepeats	Insertion	HiFi	stringent	0.0173	-587.522	0.1031	0.0024	0	0.7324
DirectRepeats	Insertion	HiFi	stringent	0.0136	-305.12	0.0267	0.0506	0.0348	0.9807
G4Motifs	Insertion	HiFi	stringent	0.0165	-363.593	0.081	0.3378	0.0052	0.2274
InvertedRepeats	Insertion	HiFi	stringent	0.0161	-5964.54	0.0174	0.0047	0.0835	0.9011
MirrorRepeats	Insertion	HiFi	stringent	0.0142	-331.105	0.2387	0.0068	0.3801	0.6283
ZDNAMotifs	Insertion	HiFi	stringent	0.0107	-100.357	0.2838	0.0054	0.0494	0.7663
APhasedRepeats	Deletion	HiFi	stringent	0.0731	-2750.76	0.0156	0.0041	0.0009	0.9015
DirectRepeats	Deletion	HiFi	stringent	0.0912	-2536.68	0.0624	0.0007	0.0245	0.9351
G4Motifs	Deletion	HiFi	stringent	0.1066	-3066.77	0.0166	0.0578	0.0305	0.2677
InvertedRepeats	Deletion	HiFi	stringent	0.1229	-56929.9	0.0485	0.0006	0.0928	0.9057
MirrorRepeats	Deletion	HiFi	stringent	0.1051	-3076.91	0.1467	0.0106	0.238	0.6588
ZDNAMotifs	Deletion	HiFi	stringent	0.0903	-990.399	0.1134	0.0112	0.0573	0.7902
APhasedRepeats	SNM	ONT	stringent	0.0155	-5568.6	0.0023	0.7112	0.0014	0.0041
DirectRepeats	SNM	ONT	stringent	0.0174	-5532.11	0.0316	0.9173	0.0273	0.0007
G4Motifs	SNM	ONT	stringent	0.0333	-9411.42	0.0139	0.4293	0.0032	0
InvertedRepeats	SNM	ONT	stringent	0.0173	-74698.9	0.0048	0.8501	0.0176	0.0283
MirrorRepeats	SNM	ONT	stringent	0.0239	-9247.16	0.0177	0.8432	0.0135	0.0074
ZDNAMotifs	SNM	ONT	stringent	0.0146	-1790.06	0.0385	0.7395	0.0391	0.0012
APhasedRepeats	Insertion	ONT	stringent	0.0238	-1480.84	0.0469	0.8981	0.0004	0.1982
DirectRepeats	Insertion	ONT	stringent	0.0321	-1646.58	0.0003	0.9267	0.0093	0.1629
G4Motifs	Insertion	ONT	stringent	0.1698	-7910.96	0.0162	0.1451	0.0038	0.0005
InvertedRepeats	Insertion	ONT	stringent	0.016	-15471.1	0.0291	0.8801	0.0115	0.2475
MirrorRepeats	Insertion	ONT	stringent	0.0431	-2123.05	0.0823	0.9556	0.0647	0.06
ZDNAMotifs	Insertion	ONT	stringent	0.0148	-446.267	0.109	0.9276	0.0093	0.1183
APhasedRepeats	Deletion	ONT	stringent	0.0857	-10686.4	0.0314	0.4026	0.0031	0.7495
DirectRepeats	Deletion	ONT	stringent	0.1147	-12774.1	0.0093	0.5274	0.0258	0.6139
G4Motifs	Deletion	ONT	stringent	0.1974	-20798.7	0.005	0.2894	0.0058	0.1709
InvertedRepeats	Deletion	ONT	stringent	0.0941	-179865	0.0291	0.4028	0.0623	0.7478
MirrorRepeats	Deletion	ONT	stringent	0.1093	-11519.6	0.0977	0.5612	0.1633	0.5055
ZDNAMotifs	Deletion	ONT	stringent	0.074	-3946.82	0.0071	0.4901	0.0435	0.5333

## Sheet: Table S6
Table S6. SNM Error rates calculated from read pair overlaps. Shown are error rates in different types of non-B motifs, calculated by detecting differences between overlapping mates in read pairs. The results for the randomized control intervals are shown alongside the actual non-B motifs. Listed are the number of errors detected, the number of bases of overlap examined, the error rate calculated…
Non-B Type	Errors		bp of Overlap
	Control	Motif	Control	Motif	Control	Motif	Increase		χ²	p-value
APhasedRepeats	60	61	119218	119424	0.0503	0.0511	1.0159	0.0159046	0.00663156	0.935251
DirectRepeats	160	101	241588	164398	0.0662	0.0614	0.927492	-0.0725076	15.2266	9.5e-05
G4Motifs	81	253	152530	132242	0.0531	0.1913	3.60264	2.60264	516.112	< 0.00001
InvertedRepeats	791	676	1426180	1395058	0.0555	0.0485	0.873874	-0.126126	7.76403	0.00533
MirrorRepeats	279	264	508982	494961	0.0548	0.0533	0.972628	-0.0273723	2.37559	0.123213
ZDNAMotifs	39	52	63404	44324	0.0615	0.1173	1.90732	0.907317	40.2723	< 0.00001

## Sheet: Table S7
Table S7. Sequencing success in non-B motif subregions. In each row, aggregated (total number of errors divided by total number of nucleotides) and per-motif SNM error means are shown for each non-B motif type, the motif subregion, error type, technology, and filtering level.
Non-B type	Subregion	Error type	Technology	Filtering level	Overall mean	Per motif mean
APhasedRepeats	Repeat / stem	Deletion	HiFi	moderate	0.00206824	0.00186005
APhasedRepeats	Spacer / loop	Deletion	HiFi	moderate	0.00074319	0.00071247
APhasedRepeats	Repeat / stem	Insertion	HiFi	moderate	0.00191654	0.00188131
APhasedRepeats	Spacer / loop	Insertion	HiFi	moderate	0.00156239	0.00169844
APhasedRepeats	Repeat / stem	Single-nucleotide	HiFi	moderate	0.00232404	0.00129759
APhasedRepeats	Spacer / loop	Single-nucleotide	HiFi	moderate	0.00331665	0.00136889
DirectRepeats	Repeat / stem	Deletion	HiFi	moderate	0.00171269	0.00160796
DirectRepeats	Spacer / loop	Deletion	HiFi	moderate	0.00154607	0.00176026
DirectRepeats	Repeat / stem	Insertion	HiFi	moderate	0.00132084	0.00134019
DirectRepeats	Spacer / loop	Insertion	HiFi	moderate	0.00145017	0.00173131
DirectRepeats	Repeat / stem	Single-nucleotide	HiFi	moderate	0.00238533	0.00161484
DirectRepeats	Spacer / loop	Single-nucleotide	HiFi	moderate	0.00286549	0.00191472
G4Motifs	Repeat / stem	Deletion	HiFi	moderate	0.00384852	0.0036227
G4Motifs	Spacer / loop	Deletion	HiFi	moderate	0.00062882	0.0006361
G4Motifs	Repeat / stem	Insertion	HiFi	moderate	0.00193916	0.00190774
G4Motifs	Spacer / loop	Insertion	HiFi	moderate	0.00215611	0.00337248
G4Motifs	Repeat / stem	Single-nucleotide	HiFi	moderate	0.00171703	0.00170767
G4Motifs	Spacer / loop	Single-nucleotide	HiFi	moderate	0.00180709	0.00203635
InvertedRepeats	Repeat / stem	Deletion	HiFi	moderate	0.00140468	0.00141671
InvertedRepeats	Spacer / loop	Deletion	HiFi	moderate	0.00124594	0.00187388
InvertedRepeats	Repeat / stem	Insertion	HiFi	moderate	0.0012308	0.00123376
InvertedRepeats	Spacer / loop	Insertion	HiFi	moderate	0.00118555	0.00172394
InvertedRepeats	Repeat / stem	Single-nucleotide	HiFi	moderate	0.00155125	0.00136359
InvertedRepeats	Spacer / loop	Single-nucleotide	HiFi	moderate	0.00158243	0.00143409
MirrorRepeats	Repeat / stem	Deletion	HiFi	moderate	0.00199482	0.00200342
MirrorRepeats	Spacer / loop	Deletion	HiFi	moderate	0.00114205	0.00134163
MirrorRepeats	Repeat / stem	Insertion	HiFi	moderate	0.00139809	0.001398
MirrorRepeats	Spacer / loop	Insertion	HiFi	moderate	0.00105993	0.00135232
MirrorRepeats	Repeat / stem	Single-nucleotide	HiFi	moderate	0.00149569	0.00145396
MirrorRepeats	Spacer / loop	Single-nucleotide	HiFi	moderate	0.00132826	0.00144768
APhasedRepeats	Repeat / stem	Deletion	Illumina	moderate	2.6e-05	2.63e-05
APhasedRepeats	Spacer / loop	Deletion	Illumina	moderate	1.91e-05	1.97e-05
APhasedRepeats	Repeat / stem	Insertion	Illumina	moderate	1.42e-05	1.33e-05
APhasedRepeats	Spacer / loop	Insertion	Illumina	moderate	1.25e-05	1.69e-05
APhasedRepeats	Repeat / stem	Single-nucleotide	Illumina	moderate	0.00165839	0.00173386
APhasedRepeats	Spacer / loop	Single-nucleotide	Illumina	moderate	0.00235467	0.00242947
DirectRepeats	Repeat / stem	Deletion	Illumina	moderate	0.00010852	0.00012577
DirectRepeats	Spacer / loop	Deletion	Illumina	moderate	0.00010778	0.00023645
DirectRepeats	Repeat / stem	Insertion	Illumina	moderate	0.00010473	0.00012687
DirectRepeats	Spacer / loop	Insertion	Illumina	moderate	8.02e-05	0.00014558
DirectRepeats	Repeat / stem	Single-nucleotide	Illumina	moderate	0.00236538	0.0027698
DirectRepeats	Spacer / loop	Single-nucleotide	Illumina	moderate	0.00283156	0.0038467
G4Motifs	Repeat / stem	Deletion	Illumina	moderate	6.61e-05	6.46e-05
G4Motifs	Spacer / loop	Deletion	Illumina	moderate	4.92e-05	9.88e-05
G4Motifs	Repeat / stem	Insertion	Illumina	moderate	4.23e-05	4.27e-05
G4Motifs	Spacer / loop	Insertion	Illumina	moderate	3.88e-05	9.65e-05
G4Motifs	Repeat / stem	Single-nucleotide	Illumina	moderate	0.00210788	0.00209936
G4Motifs	Spacer / loop	Single-nucleotide	Illumina	moderate	0.00678983	0.0124566
InvertedRepeats	Repeat / stem	Deletion	Illumina	moderate	2.9e-05	2.99e-05
InvertedRepeats	Spacer / loop	Deletion	Illumina	moderate	2.38e-05	3.97e-05
InvertedRepeats	Repeat / stem	Insertion	Illumina	moderate	1.93e-05	1.89e-05
InvertedRepeats	Spacer / loop	Insertion	Illumina	moderate	1.03e-05	1.77e-05
InvertedRepeats	Repeat / stem	Single-nucleotide	Illumina	moderate	0.00201929	0.00212657
InvertedRepeats	Spacer / loop	Single-nucleotide	Illumina	moderate	0.00214465	0.00224242
MirrorRepeats	Repeat / stem	Deletion	Illumina	moderate	5.74e-05	6.26e-05
MirrorRepeats	Spacer / loop	Deletion	Illumina	moderate	2.28e-05	5.93e-05
MirrorRepeats	Repeat / stem	Insertion	Illumina	moderate	5.26e-05	6.05e-05
MirrorRepeats	Spacer / loop	Insertion	Illumina	moderate	1.08e-05	5.17e-05
MirrorRepeats	Repeat / stem	Single-nucleotide	Illumina	moderate	0.0021096	0.00238214
MirrorRepeats	Spacer / loop	Single-nucleotide	Illumina	moderate	0.00215749	0.00292716
APhasedRepeats	Repeat / stem	Deletion	ONT	moderate	0.0117314	0.0111045
APhasedRepeats	Spacer / loop	Deletion	ONT	moderate	0.0115167	0.0116863
APhasedRepeats	Repeat / stem	Insertion	ONT	moderate	0.00821538	0.00835336
APhasedRepeats	Spacer / loop	Insertion	ONT	moderate	0.00906345	0.00946819
APhasedRepeats	Repeat / stem	Single-nucleotide	ONT	moderate	0.0146409	0.012372
APhasedRepeats	Spacer / loop	Single-nucleotide	ONT	moderate	0.0215765	0.0179955
DirectRepeats	Repeat / stem	Deletion	ONT	moderate	0.0104723	0.0103615
DirectRepeats	Spacer / loop	Deletion	ONT	moderate	0.0121236	0.0131989
DirectRepeats	Repeat / stem	Insertion	ONT	moderate	0.00731211	0.00735725
DirectRepeats	Spacer / loop	Insertion	ONT	moderate	0.00858976	0.00989567
DirectRepeats	Repeat / stem	Single-nucleotide	ONT	moderate	0.0171267	0.0144025
DirectRepeats	Spacer / loop	Single-nucleotide	ONT	moderate	0.0190692	0.016944
G4Motifs	Repeat / stem	Deletion	ONT	moderate	0.0240944	0.0228649
G4Motifs	Spacer / loop	Deletion	ONT	moderate	0.0132212	0.0136603
G4Motifs	Repeat / stem	Insertion	ONT	moderate	0.0155109	0.0160393
G4Motifs	Spacer / loop	Insertion	ONT	moderate	0.0129002	0.0179402
G4Motifs	Repeat / stem	Single-nucleotide	ONT	moderate	0.0231326	0.0227447
G4Motifs	Spacer / loop	Single-nucleotide	ONT	moderate	0.0192129	0.0189219
InvertedRepeats	Repeat / stem	Deletion	ONT	moderate	0.0108869	0.0108822
InvertedRepeats	Spacer / loop	Deletion	ONT	moderate	0.0113963	0.0141918
InvertedRepeats	Repeat / stem	Insertion	ONT	moderate	0.00762334	0.00758002
InvertedRepeats	Spacer / loop	Insertion	ONT	moderate	0.00768554	0.0106792
InvertedRepeats	Repeat / stem	Single-nucleotide	ONT	moderate	0.0192578	0.0154045
InvertedRepeats	Spacer / loop	Single-nucleotide	ONT	moderate	0.0176155	0.0168981
MirrorRepeats	Repeat / stem	Deletion	ONT	moderate	0.0116849	0.0116875
MirrorRepeats	Spacer / loop	Deletion	ONT	moderate	0.0101668	0.0106907
MirrorRepeats	Repeat / stem	Insertion	ONT	moderate	0.00766279	0.00764704
MirrorRepeats	Spacer / loop	Insertion	ONT	moderate	0.00681459	0.00778728
MirrorRepeats	Repeat / stem	Single-nucleotide	ONT	moderate	0.0135161	0.0132473
MirrorRepeats	Spacer / loop	Single-nucleotide	ONT	moderate	0.0158835	0.0153732
APhasedRepeats	Repeat / stem	Deletion	HiFi	stringent	0.00202061	0.00181665
APhasedRepeats	Spacer / loop	Deletion	HiFi	stringent	0.00074881	0.00074156
APhasedRepeats	Repeat / stem	Insertion	HiFi	stringent	0.00193676	0.00189579
APhasedRepeats	Spacer / loop	Insertion	HiFi	stringent	0.0015258	0.00163555
APhasedRepeats	Repeat / stem	Single-nucleotide	HiFi	stringent	0.0012466	0.00122498
APhasedRepeats	Spacer / loop	Single-nucleotide	HiFi	stringent	0.00131536	0.00129423
DirectRepeats	Repeat / stem	Deletion	HiFi	stringent	0.00134595	0.00134618
DirectRepeats	Spacer / loop	Deletion	HiFi	stringent	0.0013746	0.00139024
DirectRepeats	Repeat / stem	Insertion	HiFi	stringent	0.00113335	0.00114573
DirectRepeats	Spacer / loop	Insertion	HiFi	stringent	0.0013073	0.00151228
DirectRepeats	Repeat / stem	Single-nucleotide	HiFi	stringent	0.00137985	0.00136662
DirectRepeats	Spacer / loop	Single-nucleotide	HiFi	stringent	0.00152502	0.00145441
G4Motifs	Repeat / stem	Deletion	HiFi	stringent	0.00423595	0.00397078
G4Motifs	Spacer / loop	Deletion	HiFi	stringent	0.00065718	0.00069833
G4Motifs	Repeat / stem	Insertion	HiFi	stringent	0.00196813	0.00192908
G4Motifs	Spacer / loop	Insertion	HiFi	stringent	0.00209002	0.00321995
G4Motifs	Repeat / stem	Single-nucleotide	HiFi	stringent	0.00143623	0.00145627
G4Motifs	Spacer / loop	Single-nucleotide	HiFi	stringent	0.00154058	0.00178271
InvertedRepeats	Repeat / stem	Deletion	HiFi	stringent	0.00149292	0.00150878
InvertedRepeats	Spacer / loop	Deletion	HiFi	stringent	0.00150823	0.00204495
InvertedRepeats	Repeat / stem	Insertion	HiFi	stringent	0.00126661	0.00127128
InvertedRepeats	Spacer / loop	Insertion	HiFi	stringent	0.00141451	0.00188471
InvertedRepeats	Repeat / stem	Single-nucleotide	HiFi	stringent	0.00137837	0.00132814
InvertedRepeats	Spacer / loop	Single-nucleotide	HiFi	stringent	0.00136673	0.0014338
MirrorRepeats	Repeat / stem	Deletion	HiFi	stringent	0.00204409	0.00205417
MirrorRepeats	Spacer / loop	Deletion	HiFi	stringent	0.00118345	0.0012777
MirrorRepeats	Repeat / stem	Insertion	HiFi	stringent	0.00137769	0.00138535
MirrorRepeats	Spacer / loop	Insertion	HiFi	stringent	0.00107152	0.0013013
MirrorRepeats	Repeat / stem	Single-nucleotide	HiFi	stringent	0.0014894	0.00148795
MirrorRepeats	Spacer / loop	Single-nucleotide	HiFi	stringent	0.00133257	0.00148711
APhasedRepeats	Repeat / stem	Deletion	Illumina	stringent	2.36e-05	2.07e-05
APhasedRepeats	Spacer / loop	Deletion	Illumina	stringent	1.61e-05	1.69e-05
APhasedRepeats	Repeat / stem	Insertion	Illumina	stringent	1.79e-05	1.5e-05
APhasedRepeats	Spacer / loop	Insertion	Illumina	stringent	1.51e-05	1.23e-05
APhasedRepeats	Repeat / stem	Single-nucleotide	Illumina	stringent	0.00169152	0.00177767
APhasedRepeats	Spacer / loop	Single-nucleotide	Illumina	stringent	0.00231392	0.00239406
DirectRepeats	Repeat / stem	Deletion	Illumina	stringent	6.44e-05	7.26e-05
DirectRepeats	Spacer / loop	Deletion	Illumina	stringent	8.57e-05	0.00011279
DirectRepeats	Repeat / stem	Insertion	Illumina	stringent	1.75e-05	2.26e-05
DirectRepeats	Spacer / loop	Insertion	Illumina	stringent	4.27e-05	4.41e-05
DirectRepeats	Repeat / stem	Single-nucleotide	Illumina	stringent	0.00230116	0.00246313
DirectRepeats	Spacer / loop	Single-nucleotide	Illumina	stringent	0.00247556	0.00298377
G4Motifs	Repeat / stem	Deletion	Illumina	stringent	5.75e-05	6.44e-05
G4Motifs	Spacer / loop	Deletion	Illumina	stringent	4.7e-05	9.95e-05
G4Motifs	Repeat / stem	Insertion	Illumina	stringent	3.79e-05	3.83e-05
G4Motifs	Spacer / loop	Insertion	Illumina	stringent	3.15e-05	0.0001005
G4Motifs	Repeat / stem	Single-nucleotide	Illumina	stringent	0.00202172	0.0020333
G4Motifs	Spacer / loop	Single-nucleotide	Illumina	stringent	0.00603816	0.0107397
InvertedRepeats	Repeat / stem	Deletion	Illumina	stringent	2.19e-05	2.2e-05
InvertedRepeats	Spacer / loop	Deletion	Illumina	stringent	2.39e-05	3.27e-05
InvertedRepeats	Repeat / stem	Insertion	Illumina	stringent	8.86e-06	8.88e-06
InvertedRepeats	Spacer / loop	Insertion	Illumina	stringent	7.43e-06	1.14e-05
InvertedRepeats	Repeat / stem	Single-nucleotide	Illumina	stringent	0.00204985	0.00213576
InvertedRepeats	Spacer / loop	Single-nucleotide	Illumina	stringent	0.00215506	0.00228291
MirrorRepeats	Repeat / stem	Deletion	Illumina	stringent	2.24e-05	2.23e-05
MirrorRepeats	Spacer / loop	Deletion	Illumina	stringent	1.73e-05	1.82e-05
MirrorRepeats	Repeat / stem	Insertion	Illumina	stringent	1.07e-05	1.57e-05
MirrorRepeats	Spacer / loop	Insertion	Illumina	stringent	1.37e-06	3.06e-06
MirrorRepeats	Repeat / stem	Single-nucleotide	Illumina	stringent	0.0020493	0.00220426
MirrorRepeats	Spacer / loop	Single-nucleotide	Illumina	stringent	0.00215383	0.00272823
APhasedRepeats	Repeat / stem	Deletion	ONT	stringent	0.0118293	0.0110999
APhasedRepeats	Spacer / loop	Deletion	ONT	stringent	0.0115119	0.011653
APhasedRepeats	Repeat / stem	Insertion	ONT	stringent	0.00820934	0.00833969
APhasedRepeats	Spacer / loop	Insertion	ONT	stringent	0.00908003	0.00937563
APhasedRepeats	Repeat / stem	Single-nucleotide	ONT	stringent	0.012563	0.0124118
APhasedRepeats	Spacer / loop	Single-nucleotide	ONT	stringent	0.0180013	0.0180426
DirectRepeats	Repeat / stem	Deletion	ONT	stringent	0.0109157	0.0109223
DirectRepeats	Spacer / loop	Deletion	ONT	stringent	0.0119226	0.0130102
DirectRepeats	Repeat / stem	Insertion	ONT	stringent	0.00727441	0.00730985
DirectRepeats	Spacer / loop	Insertion	ONT	stringent	0.00829039	0.0093276
DirectRepeats	Repeat / stem	Single-nucleotide	ONT	stringent	0.0163871	0.0160413
DirectRepeats	Spacer / loop	Single-nucleotide	ONT	stringent	0.0179063	0.0175983
G4Motifs	Repeat / stem	Deletion	ONT	stringent	0.0224403	0.0209404
G4Motifs	Spacer / loop	Deletion	ONT	stringent	0.0125355	0.0127996
G4Motifs	Repeat / stem	Insertion	ONT	stringent	0.0151256	0.0156078
G4Motifs	Spacer / loop	Insertion	ONT	stringent	0.0122421	0.0165963
G4Motifs	Repeat / stem	Single-nucleotide	ONT	stringent	0.0237741	0.0234415
G4Motifs	Spacer / loop	Single-nucleotide	ONT	stringent	0.0185093	0.0183328
InvertedRepeats	Repeat / stem	Deletion	ONT	stringent	0.0116834	0.0116685
InvertedRepeats	Spacer / loop	Deletion	ONT	stringent	0.0132229	0.015534
InvertedRepeats	Repeat / stem	Insertion	ONT	stringent	0.00797509	0.00799275
InvertedRepeats	Spacer / loop	Insertion	ONT	stringent	0.00917807	0.0117829
InvertedRepeats	Repeat / stem	Single-nucleotide	ONT	stringent	0.0162936	0.0160354
InvertedRepeats	Spacer / loop	Single-nucleotide	ONT	stringent	0.0175925	0.017467
MirrorRepeats	Repeat / stem	Deletion	ONT	stringent	0.0126907	0.0126809
MirrorRepeats	Spacer / loop	Deletion	ONT	stringent	0.0105865	0.0111931
MirrorRepeats	Repeat / stem	Insertion	ONT	stringent	0.00778128	0.00777322
MirrorRepeats	Spacer / loop	Insertion	ONT	stringent	0.00702286	0.00816255
MirrorRepeats	Repeat / stem	Single-nucleotide	ONT	stringent	0.014728	0.0146002
MirrorRepeats	Spacer / loop	Single-nucleotide	ONT	stringent	0.0166174	0.0162854

## Sheet: Table S8
Table S8. Adjusted p-values for comparing SNM error rates between subregions of non-B motifs. Shown are Benjamini-Hochberg corrected p-values calculated for t-test comparing SNM error rates between different subregions (repeat arm/ stem vs. spacer / loop) of non-B motifs.
Type	Technology	Filtering level	adjusted P-value
APhasedRepeats	Illumina	moderate	0
DirectRepeats	Illumina	moderate	1.12e-105
G4Motifs	Illumina	moderate	0
InvertedRepeats	Illumina	moderate	1.78e-73
MirrorRepeats	Illumina	moderate	2.65e-111
APhasedRepeats	HiFi	moderate	0.0196649
DirectRepeats	HiFi	moderate	2.22e-09
G4Motifs	HiFi	moderate	3.04e-11
InvertedRepeats	HiFi	moderate	1.55e-11
MirrorRepeats	HiFi	moderate	0.995559
APhasedRepeats	ONT	moderate	0
DirectRepeats	ONT	moderate	9.99e-254
G4Motifs	ONT	moderate	0
InvertedRepeats	ONT	moderate	0
MirrorRepeats	ONT	moderate	0
APhasedRepeats	Illumina	stringent	5.04e-77
DirectRepeats	Illumina	stringent	0.00015971
G4Motifs	Illumina	stringent	0
InvertedRepeats	Illumina	stringent	1.47e-16
MirrorRepeats	Illumina	stringent	6.74e-05
APhasedRepeats	HiFi	stringent	0.995092
DirectRepeats	HiFi	stringent	0.995559
G4Motifs	HiFi	stringent	0.00491438
InvertedRepeats	HiFi	stringent	0.00101363
MirrorRepeats	HiFi	stringent	0.995559
APhasedRepeats	ONT	stringent	0
DirectRepeats	ONT	stringent	7.58e-11
G4Motifs	ONT	stringent	4.86e-159
InvertedRepeats	ONT	stringent	1.19e-201
MirrorRepeats	ONT	stringent	1.63e-16

## Sheet: Table S9
Table S9. Expected number of false-positive SNVs in three existing datasets.
				Expected number of FP SNVs
Dataset	Number of haploid genomes	MAF	Read depth (per haploid genome)	NonB	BDNA
1000Genomes	5008	Singletons	1	109615879	109617975
SGDP	600	Singletons	21	0	0
gnomAD	152312	Singletons	15	11044	2480
1000Genomes	5008	Tripletons	1	109372266	109484576
SGDP	600	Tripletons	21	0	0
gnomAD	152312	Tripletons	15	0	0
1000Genomes	5008	0.01	1	19	0
SGDP	600	0.01	21	0	0
gnomAD	152312	0.01	15	0	0
